# Supplementary material for: Phenotypic Selection on Flower Color and Floral Display Size by Three Bee Species
Source: Front Plant Sci. 2021 Jan 14;11:587528. doi: 10.3389/fpls.2020.587528 (PMC7840534; doi:10.3389/fpls.2020.587528)
Supplement: Supplementary file 1 [file Data_Sheet_1.CSV]

Patch	Plant	Total Visits	BBVisit	HBVisit	LCVisit	Seedset	RF Combined bees	Hue	Reflectivity	Chroma	TotlFlr/raceme	Racemes/Stems	Stems/plant
Near3	1	18	16	2	0	134.69	0.19	-0.28	3.39	1.63	6.3	1.7	17
Near3	2	20	18	2	0	203.15	0.29	0.16	3.58	0.85	12.3	3.9	14
Near3	3	46	21	24	1	1367.4	1.96	1.16	5.97	2.5	9.9	4.2	57
Near3	4	127	74	53	0	398.16	0.57	0.19	3.81	1.25	9.7	3	27
Near3	5	400	198	201	1	1219.3	1.74	-0.14	2.89	1.36	9	5	44
Near3	6	4	0	4	0	108.68	0.16	-0.45	2.07	3.29	6.5	1.1	30
Near3	7	38	24	11	3	716.69	1.02	-0.21	3.55	0.97	9.1	7.5	18
Near3	8	5	0	5	0	7.4	0.01	0.33	4.4	0.73	5.5	1	6
Near3	9	81	46	35	0	672.7	0.96	0.15	5.37	0.74	11.3	4.6	21
Near3	10	4	4	0	0	267.29	0.38	-0.42	3.28	1.79	6.1	0.5	24
Near3	11	61	61	0	0	493.64	0.71	-0.09	2.17	1.72	8.2	3.4	28
Near3	12	11	11	0	0	379.08	0.54	-0.32	2.25	2.69	4.7	2.4	15
Near3	13	194	97	97	0	1678.33	2.4	0.78	4.43	1.3	14.2	7.2	19
Near3	15	17	8	9	0	1174.34	1.68	-0.24	1.76	3.27	10.4	6.4	22
Near3	16	54	23	31	0	3654.11	5.23	0.82	3.31	1.65	9.7	6.5	81
Near3	17	6	1	5	0	347.26	0.5	-0.08	3.26	1.48	8.3	5.1	26
Near3	18	145	142	3	0	482.1	0.69	-0.28	4.57	1.15	12.6	10.2	9
Near3	19	8	7	1	0	286.8	0.41	-0.54	2.76	2.24	9.1	5.6	21
Near3	20	102	37	65	0	2841.7	4.06	-0.37	4.79	1.36	9	5.8	52
Near3	21	101	31	66	4	1003.75	1.44	0.09	4.34	0.81	9.9	5.8	32
Near3	22	54	35	18	1	454.86	0.65	1.06	5.31	1.15	10.2	5.1	37
Near3	23	28	23	5	0	263.68	0.38	-0.31	3.79	1.84	8.9	4.8	30
Near3	24	53	44	7	2	725.29	1.04	0.76	4.96	1.04	9.1	4.2	33
Near3	25	35	28	3	4	886.86	1.27	-0.04	4.3	1	6.6	2.7	35
Near3	26	28	3	10	15	578.7	0.83	-0.42	2.94	3.28	9.9	9.5	28
Near3	27	15	7	8	0	635.8	0.91	-0.2	4.35	0.98	7.8	1.5	42
Near3	28	135	37	93	5	1673.83	2.39	0.46	5.63	1.07	7.2	3.5	45
Near3	29	9	9	0	0	200.12	0.29	0.14	4.16	1.22	7.3	2.8	29
Near3	30	40	14	23	3	1058.26	1.51	-0.22	3.52	1.79	5.5	5.6	26
Near3	31	17	2	15	0	84.28	0.12	0.49	3.46	1.98	4.4	3.9	42
Near3	32	11	4	7	0	764.4	1.09	-0.15	4.19	1.16	7.6	4.4	20
Near3	33	15	15	0	0	707.05	1.01	0.85	4.13	0.91	6.2	3.9	23
Near3	34	2	2	0	0	65.24	0.09	-0.34	4.03	1.28	3.7	2	11
Near3	35	5	3	2	0	959.21	1.37	-0.18	3.52	1.55	9.8	4.1	22
Near3	36	36	32	3	1	2008.89	2.87	0.07	3.16	1.4	6.9	4.1	58
Near3	37	242	137	102	3	1226.4	1.75	-0.09	3.28	1	7.5	9.5	35
Near3	38	189	30	159	0	238.32	0.34	0.65	5.69	1.46	6.2	3.8	29
Near3	39	124	61	48	15	475.08	0.68	0.26	4.95	0.64	4.6	3.7	40
Near3	40	58	23	35	0	1212.23	1.73	-0.16	3.91	1.59	4.5	5.5	38
Near3	41	22	9	13	0	585.6	0.84	-0.37	2.42	2.83	6.3	10.4	23
Near3	42	35	26	7	2	871.83	1.25	-0.24	3.8	0.94	4.2	5.8	39
Near3	43	89	50	38	1	429	0.61	-0.17	3.17	2.1	3	7.4	34
Near3	44	15	3	9	3	1265	1.81	-0.41	2.46	2.94	6.6	7.2	36
Near3	45	69	46	22	1	527.24	0.75	0.17	3.86	1.06	5.9	8.4	34
Near3	47	71	33	38	0	93.54	0.13	0.22	5.71	0.83	8	5.9	10
Near3	48	27	3	14	10	1663.28	2.38	0.73	5.01	1.03	4.9	3.9	38
Near3	49	46	21	25	0	334.04	0.48	-0.22	5.12	0.83	4	3.2	48
Near3	50	7	0	7	0	915.97	1.31	-0.4	2.55	1.83	5.2	4	41
Near3	51	148	136	12	0	449.33	0.64	-0.23	3.17	1.73	5.4	3.7	35
Near3	52	117	59	58	0	1243.79	1.78	-0.66	2.04	3.48	5.3	8.3	49
Near3	53	89	7	72	10	560.65	0.8	-0.23	3.93	1.5	5.3	9	26
Near3	54	39	8	31	0	915.63	1.31	-0.45	2.88	2.61	6.9	6.4	50
Near3	55	27	27	0	0	201.21	0.29	-0.17	4.16	1.18	8.1	1.1	17
Near3	56	140	108	30	2	453.48	0.65	-0.08	5.81	1.04	6.6	10.5	20
Near3	57	19	17	2	0	470.18	0.67	-0.67	3.72	1.75	6.1	3.5	11
Near3	58	101	42	59	0	1137.71	1.63	0.59	5.27	0.75	4	4.9	33
Near3	59	52	32	20	0	671.86	0.96	0	3.59	2.23	7.3	6.8	34
Near3	60	20	12	8	0	357.34	0.51	-0.6	3.05	2.38	5.9	4.2	35
Near3	61	2	2	0	0	500.41	0.72	-0.62	3.55	2.54	7.5	1.4	17
Near3	62	60	52	8	0	616.67	0.88	-0.48	2.48	3.03	7.1	3.7	21
Near3	63	21	10	11	0	660.3	0.94	-0.8	3.62	1.32	8	5.7	33
Near3	64	96	80	16	0	226.84	0.32	-0.22	4.35	0.98	8.4	8.8	26
Near3	65	29	9	18	2	297.32	0.43	-0.37	3.38	1.36	6.7	8.8	26
Near3	67	318	172	145	1	1150.61	1.65	-0.08	2.7	2.15	6.5	7	36
Near3	68	13	12	0	1	124.81	0.18	1.15	6.45	0.92	9.3	5.5	14
Near3	69	27	26	0	1	619.54	0.89	-0.41	2.62	2.49	6.8	3.1	45
Near3	70	21	20	1	0	87.42	0.13	-0.13	5.46	0.99	5.4	6.5	11
Near3	71	31	25	6	0	200.42	0.29	0.33	5.5	1.24	8.4	4.7	38
Near3	72	4	1	3	0	147.1	0.21	-0.4	3.6	1.59	10.4	2.2	33
Near3	73	15	15	0	0	1117.53	1.6	-0.54	4.13	1.93	5.3	14.6	18
Near3	75	224	221	1	2	1390.26	1.99	-0.29	3.83	1.6	12.9	2.2	46
Near3	76	24	22	0	2	465.72	0.67	-0.16	3.7	1.51	3.4	5.6	31
Near3	77	87	69	18	0	734.6	1.05	-0.24	4.68	1.33	8.1	2.3	40
Near3	78	25	21	4	0	1343.91	1.92	0.43	3.63	1.01	4.9	7.4	26
Near3	79	15	12	3	0	584.53	0.84	1.09	4.1	1.77	13.2	6.4	29
Near3	80	52	51	1	0	156.42	0.22	0.49	4.09	0.96	9.4	6.4	43
Near3	81	258	240	18	0	1686.67	2.41	-0.24	3.34	1.12	8.6	6.3	26
Near4	1	1	0	1	0	266.53	0.38	-0.46	2.61	2.128	6.7	1.5	72
Near4	2	176	5	171	0	1053.25	1.51	0.57	3.87	0.64	12.7	2.7	33
Near4	3	4	0	4	0	2388.43	3.42	-0.39	3.76	0.556	5.9	5.3	57
Near4	4	6	6	0	0	202.78	0.29	-0.58	2.11	2.402	6.8	5.9	34
Near4	5	4	4	0	0	506.55	0.72	-0.42	2.86	0.707	4.6	2.4	26
Near4	6	16	3	13	0	886.33	1.27	-0.44	3.39	1.436	4.6	4.7	59
Near4	7	443	236	191	16	940.63	1.35	-0.47	4.81	0.724	6.5	9.8	65
Near4	8	1	1	0	0	161.92	0.23	-0.1	4.35	0.349	4.9	2.2	12
Near4	9	52	11	32	9	2442.8	3.49	-0.53	2.28	2.735	8	8	78
Near4	10	7	7	0	0	467.76	0.67	1.21	7.14	0.404	13.2	8.5	26
Near4	11	11	1	7	3	111.05	0.16	0.89	3.49	0.606	9	5.4	13
Near4	12	0	0	0	0	11.05	0.02	1.08	4.89	0.471	3.3	1.1	10
Near4	13	39	13	21	5	209.14	0.3	-0.26	3.48	0.738	12.8	5.8	41
Near4	15	9	0	9	0	1073.86	1.54	-0.39	2.54	1.929	6.7	8.5	87
Near4	16	2	2	0	0	88.67	0.13	0.15	3.04	1.127	10.1	4.9	13
Near4	17	42	24	16	2	381.82	0.55	-0.19	4.57	0.61	10	3.5	36
Near4	18	148	52	90	6	2278.12	3.26	0.35	4.84	0.343	9	7.7	66
Near4	19	0	0	0	0	524.33	0.75	-0.39	1.99	2.059	4.8	7.5	21
Near4	20	8	3	5	0	221.93	0.32	0.55	4.54	0.576	9.5	8.2	20
Near4	21	14	11	1	2	609.09	0.87	-0.23	2.48	1.766	7.4	9.3	28
Near4	22	26	23	3	0	617.69	0.88	-0.33	1.77	2.448	12.1	5.2	36
Near4	23	128	2	126	0	937.91	1.34	0.49	2.75	0.615	7.8	3.8	48
Near4	24	110	38	56	16	319.59	0.46	0.25	4.11	0.532	14.4	6.1	30
Near4	25	50	47	1	2	292.42	0.42	-0.33	4.01	0.745	6.2	2.9	21
Near4	26	13	13	0	0	720.33	1.03	-0.35	2.17	2.508	6.9	8	20
Near4	27	27	4	21	2	566.32	0.81	1.21	5.87	0.535	4	1.3	16
Near4	28	2	2	0	0	486.03	0.7	-0.04	3.47	0.907	4.9	2.4	29
Near4	29	5	4	1	0	100.75	0.14	0.05	3.93	0.34	6	3.4	17
Near4	30	1	1	0	0	682.79	0.98	-0.26	3.9	0.542	6.7	2.1	49
Near4	31	91	17	74	0	622.86	0.89	-0.33	3.58	0.738	7.3	5.4	33
Near4	32	5	2	3	0	131.88	0.19	-0.26	3.8	0.677	6.8	1.8	15
Near4	33	0	0	0	0	68.29	0.1	0.79	5.61	0.257	5.9	1.8	13
Near4	34	131	6	125	0	208.7	0.3	-0.39	3.52	0.674	7.7	4.7	23
Near4	35	179	14	165	0	138.59	0.2	0.17	5.49	0.584	8.9	4.8	11
Near4	36	683	19	663	1	1342.87	1.92	1.21	6.43	0.524	11.6	9.4	39
Near4	37	12	9	0	3	999.6	1.43	-0.27	1.78	2.388	7.5	4.6	51
Near4	38	118	102	15	1	774.84	1.11	-0.13	4.28	0.537	10.2	5.2	38
Near4	39	5	4	1	0	451.7	0.65	-0.37	3.84	1.103	5.7	3.6	16
Near4	40	24	22	2	0	487.73	0.7	-0.14	4.52	0.51	7.5	5.7	20
Near4	41	18	12	6	0	199.16	0.28	0.58	5.01	0.332	10.6	2.8	10
Near4	42	10	3	7	0	809.06	1.16	-0.38	2.7	1.57	7.3	6.7	35
Near4	43	12	7	5	0	290.2	0.42	0.55	4	0.431	10.1	2.9	31
Near4	44	18	11	7	0	545.73	0.78	0.33	4.65	0.598	7.8	4.3	28
Near4	45	125	18	106	1	487.08	0.7	-0.36	3.5	1.043	7.1	11	21
Near4	46	26	15	9	2	353.62	0.51	-0.39	2.62	1.726	7.4	11	15
Near4	47	18	10	8	0	376.17	0.54	-0.14	4.52	0.631	7.6	5.7	22
Near4	48	1	0	1	0	27	0.04	0.14	4.78	0.382	7.3	0.5	12
Near4	49	2	2	0	0	413.29	0.59	0.14	4.97	0.342	10.4	2.6	22
Near4	50	0	0	0	0	149.34	0.21	-0.02	2.53	1.038	3	0.111111111	9
Near4	51	18	0	18	0	201.58	0.29	0.3	5.35	0.308	6.8	2.7	21
Near4	52	11	0	11	0	128.1	0.18	-0.08	2.93	0.611	8.6	4.3	10
Near4	53	261	250	0	11	1473.8	2.11	-0.49	2.81	1.697	7.7	13.1	49
Near4	54	13	12	1	0	239.09	0.34	-0.14	3.47	0.417	6.2	1.1	21
Near4	55	17	17	0	0	83.55	0.12	-0.43	2.38	2.034	4.1	1.875	8
Near4	56	33	27	4	2	338.8	0.48	-0.23	2.38	0.817	4.2	5.8	44
Near4	57	0	0	0	0	430.41	0.62	-0.19	2.77	0.822	7.2	6	31
Near4	60	7	4	3	0	678.34	0.97	-0.34	2.6	1.17	8.9	2.1	15
Near4	61	7	6	0	1	1109.16	1.59	0.47	4.08	0.576	13.3	6.5	31
Near4	62	69	69	0	0	552.85	0.79	-0.48	3.48	1.429	8.4	11	26
Near4	63	6	6	0	0	363.25	0.52	0.64	4.76	0.44	7.8	2.7	22
Near4	64	130	80	46	4	3409.66	4.88	-0.01	3.21	0.888	8.7	6.9	68
Near4	65	11	11	0	0	825.24	1.18	0.27	3.65	0.389	7.1	6.9	35
Near4	67	48	48	0	0	2248.59	3.22	0.89	5.31	0.358	4.1	6.2	47
Near4	68	8	8	0	0	6.63	0.01	-0.05	3.76	0.573	11	7.1	26
Near4	69	0	0	0	0	105.14	0.15	-0.37	2.34	2.294	8.8	0.2	11
Near4	70	23	23	0	0	611.51	0.87	0.98	2.85	0.781	6.3	2.3	14
Near4	71	68	68	0	0	939.45	1.34	-0.41	2.38	2.245	7.5	9	28
Near4	72	6	6	0	0	290.81	0.42	-0.38	3.38	1.053	9	2.4	13
Near4	73	15	6	0	9	1509.09	2.16	-0.19	3.73	0.795	5.9	7.1	35
Near4	75	72	35	0	37	1390.26	1.99	-0.29	3.83	1.6	12.9	2.2	46
Near4	76	1	1	0	0	75.5	0.11	-0.77	1.97	0.88	4.8	0.8	20
Near4	77	7	7	0	0	59.51	0.09	0.9	4.84	0.544	5.6	2.6	11
Near4	78	48	47	0	1	2641.2	3.78	-0.21	3.02	0.6	5.9	5.1	67
Near4	79	2	2	0	0	920.92	1.32	-0.37	3.08	0.859	4.4	3.6	13
Near4	80	30	24	6	0	977.96	1.4	-0.28	1.8	2.802	8.3	7	13
Near4	81	0	0	0	0	29.74	0.04	-0.2	2.14	2.347	6.5	0.2	41
